# Supplementary material
Source: PubMed Central journal article supplement (PMC7436747)
Supplement: MJA2-213-276-s002.pdf [file MJA2-213-276-s002.pdf]

4 3 2 1

F

F

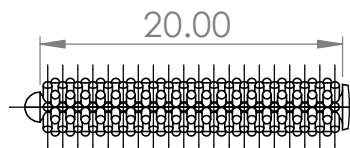

# DETAIL A

SCALE 2 : 1

E

E

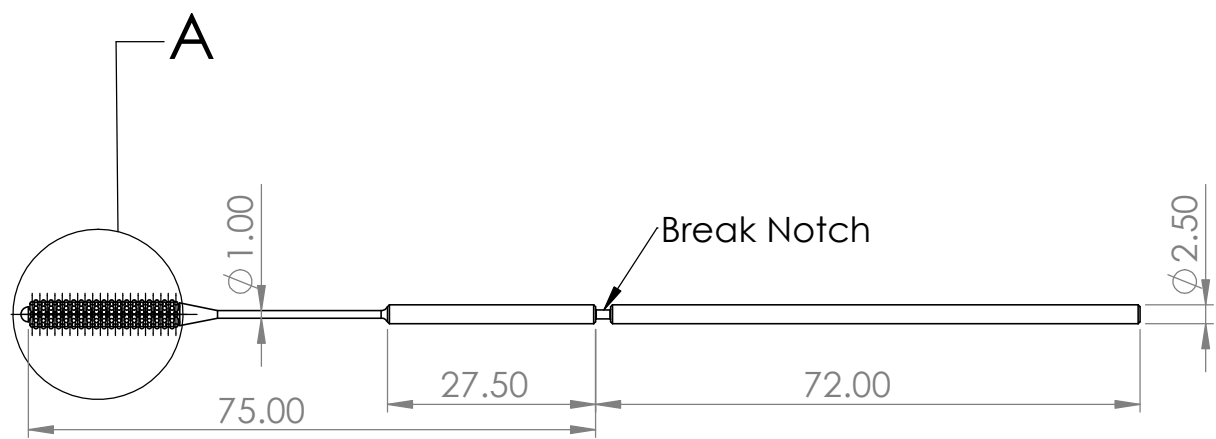

D

D

C

C

B

B

UNLESS OTHERWISE SPECIFIED:  
DIMENSIONS ARE IN MILLIMETERS  
SURFACE FINISH:  
TOLERANCES:  
LINEAR: N/A  
ANGULAR:

FINISH:  
**As Printed**

DEBURR AND  
BREAK SHARP  
EDGES

DO NOT SCALE DRAWING

REVISION **G**

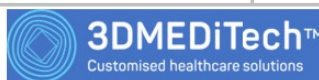

|        | NAME       | SIGNATURE | DATE     |
|--------|------------|-----------|----------|
| DRAWN  | S Logsdail |           | 13/04/20 |
| CHK'D  | N/A        |           |          |
| APPV'D | E Bert     |           | 16/04/20 |
| MFG    | N/A        |           |          |
| Q.A    | N/A        |           |          |

|                                  |                   |
|----------------------------------|-------------------|
| TITLE:<br><b>3DMEDItech Swab</b> |                   |
| MATERIAL:<br>PA2200 Nylon 12     | DWG NO.<br>1005-G |
| WEIGHT: N/A                      | SCALE: 1:1        |
|                                  | SHEET 1 OF 1      |

A

A

4 3 2 1
